# Supplementary material
Source: Royal Society of Chemistry journal article supplement (doi:10.1039/d6cp00209a)
Supplement: d6cp00209a2.pdf [file d6cp00209a2.pdf]

Electronic supporting information (ESI) file for:

## **Spherical Aromaticity in Icosahedral and Tetrahedral Gold clusters. Insights from 8-, 18- and 20-*ce* Au<sub>13</sub><sup>5+</sup>, W@Au<sub>12</sub>, and Au<sub>20</sub> Clusters**

Alvaro Muñoz-Castro<sup>a,\*</sup>

*<sup>a</sup>Facultad de Ingeniería, Universidad San Sebastián, Bellavista 7, Santiago, 8420524, Chile.*

Content:

Figure S1. Signed modulus density plots of GIMIC and integration planes for the GIMIC analysis.

Page 2

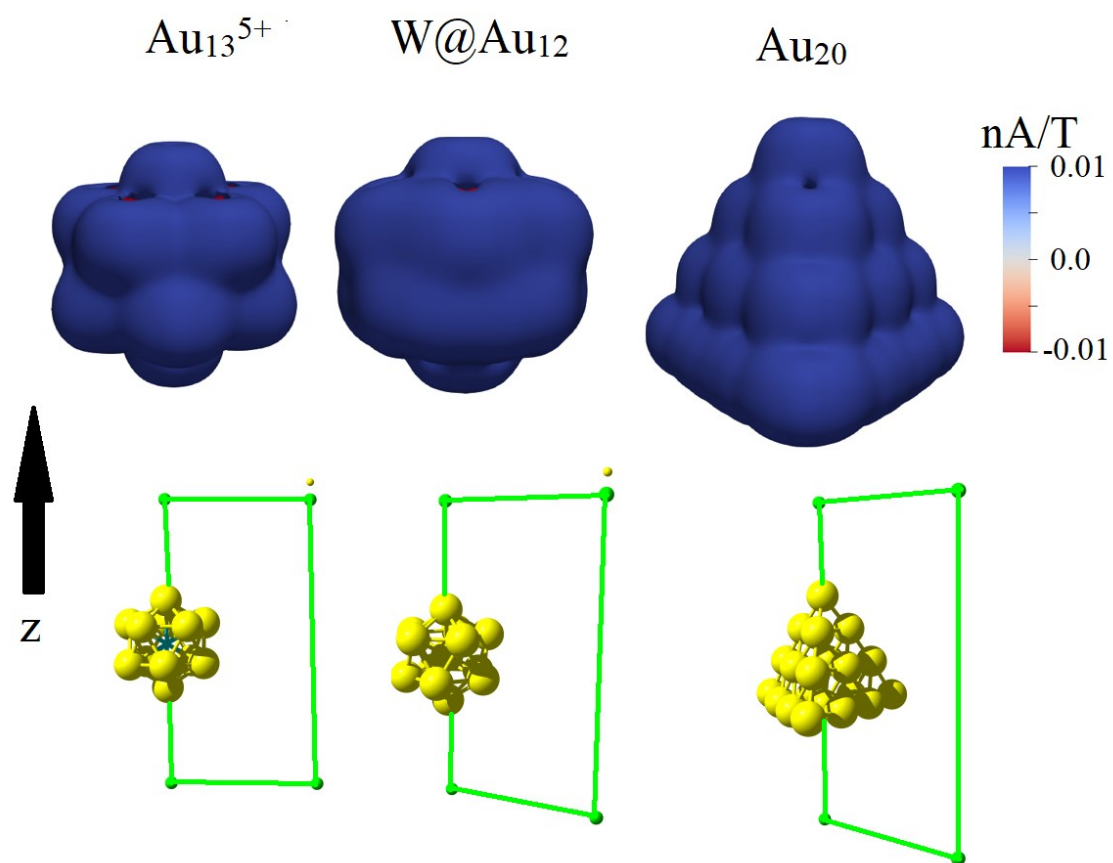

Figure S1. Signed modulus density plots of GIMIC and integration planes for the GIMIC analysis. Positive isosurfaces account for induced diatropic (aromatic) currents.
